# Supplementary material for: Among the world’s smallest vertebrates: a new miniaturized flea-toad (Brachycephalidae) from the Atlantic rainforest
Source: PeerJ. 2024 Oct 25;12:e18265. doi: 10.7717/peerj.18265 (PMC11514764; doi:10.7717/peerj.18265)
Supplement: Supplemental Information 1 — Distances within species (A) or within species groups (B) are highlighted in gray. Distances between B. dacnis and other species are in bold. [file peerj-12-18265-s001.xlsx]

## Sheet: Sheet1
TableS3: Uncorrected p-distances for the Palumbi 16S fragment between (A) individuals of Brachycephalus dacnis sp. nov. and the sister species B. hermogenesi; and (B) between species of Brachycephalus ssp. (mean distances). Distances within species (A) or within species groups (B) are highlighted in gray. Distances between B. dacnis sp. nov. and other species are in bold.
(A)			1	2	3	4	5	6	7	8	9	10	11	12
	1	B. dacnis sp. nov. OR250417
	2	B. dacnis sp. nov. OR250418	0
	3	B. dacnis sp. nov. OR250416	0	0
	4	B. dacnis sp. nov. OR250412	0	0	0
	5	B. dacnis sp. nov. OR250413	0	0	0	0
	6	B. dacnis sp. nov. OR250414	0	0	0	0	0
	7	B. dacnis sp. nov. OR250415	0	0	0	0	0	0
	8	B. dacnis sp. nov. OR250411	0	0	0	0	0	0	0
	9	B. hermogenesi OR250409	0.07	0.07	0.07	0.07	0.07	0.07	0.07	0.07
	10	B. hermogenesi OR250410	0.07	0.07	0.07	0.07	0.07	0.07	0.07	0.07	0
	11	B. hermogenesi MZ770740	0.078	0.078	0.078	0.078	0.078	0.078	0.078	0.078	0.025	0.025
	12	B. hermogenesi MT929506	0.068	0.068	0.068	0.068	0.068	0.068	0.068	0.068	0.025	0.025	0.025
	13	B. hermogenesi MT929507	0.068	0.068	0.068	0.068	0.068	0.068	0.068	0.068	0.025	0.025	0.025	0
(B)			1	2	3	4	5	6	7	8	9	10	11	12	13	14	15	16	17	18	19	20	21	22	23	24	25	26	27	28	29	30	31	32	33	34	35	36	37	38	39
	1	B. pulex
	2	B. puri	0.2352
	3	B. sp. FT	0.2174	0.1601
	4	B. sp. 8	0.2315	0.1523	0.1255
	5	B. didactylus	0.2246	0.1697	0.1592	0.1855
B. ephippium sp. Group	6	B. garbeanus	0.2335	0.167	0.1508	0.1697	0.0959
	7	B. rotembergae	0.2289	0.1701	0.147	0.167	0.088	0.0339
	8	B. margaritatus	0.2415	0.1767	0.1576	0.1793	0.1006	0.0377	0.008
B. vertebralis sp. Group	9	B. bufonoides	0.2289	0.1665	0.1621	0.1777	0.1013	0.0431	0.0339	0.0422
	10	B. alipioi	0.23	0.1612	0.1631	0.1745	0.1002	0.0452	0.0434	0.0525	0.032
	11	B. toby	0.2333	0.1697	0.161	0.1809	0.096	0.0452	0.0455	0.0547	0.0362	0.0082
	12	B. nodoterga	0.2333	0.1691	0.159	0.181	0.1017	0.0467	0.0441	0.0517	0.0349	0.0151	0.0096
	13	B. vertebralis	0.2305	0.1616	0.1635	0.1791	0.0983	0.0474	0.0498	0.0594	0.0382	0.0165	0.0124	0.0221
	14	B. crispus	0.2397	0.1697	0.1674	0.183	0.1065	0.0557	0.0582	0.0661	0.0464	0.0226	0.0185	0.0282	0.0123
	15	B. guarani	0.2333	0.1633	0.161	0.1766	0.1002	0.0494	0.0519	0.0616	0.0402	0.0164	0.0123	0.022	0.0062	0.0062
	16	B. pitanga	0.2333	0.1644	0.1621	0.1777	0.1013	0.0505	0.0529	0.0627	0.0412	0.0175	0.0134	0.0231	0.0072	0.0072	0.001
	17	B. hermogenesi	0.1687	0.1678	0.1715	0.1849	0.1662	0.1601	0.1477	0.1538	0.1458	0.1512	0.1516	0.1524	0.1502	0.1619	0.1555	0.1561
	18	B. dacnis sp. nov.	0.1573	0.1837	0.1688	0.1853	0.1738	0.1719	0.1606	0.1676	0.1577	0.1631	0.1652	0.1646	0.1656	0.1738	0.1674	0.1685	0.0784
	19	B. sulfuratus	0.2002	0.1924	0.1822	0.2034	0.1667	0.1725	0.1619	0.171	0.167	0.1694	0.1694	0.1744	0.1718	0.1777	0.1715	0.1725	0.1222	0.1144
B. pernix sp. group	20	B. tridactylus	0.1835	0.16	0.1692	0.1809	0.1486	0.151	0.1407	0.1459	0.1429	0.1475	0.152	0.1528	0.1553	0.1621	0.1553	0.1564	0.0986	0.0998	0.0919
	21	B. brunneus	0.1866	0.1762	0.1895	0.1931	0.1512	0.1524	0.1475	0.1524	0.1479	0.1512	0.1533	0.1549	0.158	0.1663	0.1598	0.1609	0.1164	0.1215	0.0872	0.0388
	22	B. leopardus	0.1824	0.1608	0.1747	0.1854	0.1458	0.1494	0.1419	0.1466	0.1446	0.1458	0.1503	0.1503	0.1526	0.1595	0.1526	0.1538	0.1065	0.1099	0.083	0.0403	0.0112
	23	B. curupira	0.1757	0.1562	0.1701	0.1808	0.1412	0.1448	0.1373	0.1416	0.1401	0.1412	0.1458	0.1458	0.1481	0.1549	0.1481	0.1492	0.0993	0.1009	0.074	0.0358	0.0022	0.0089
	24	B. izecksohni	0.1877	0.1758	0.1935	0.197	0.153	0.1564	0.1494	0.1544	0.1498	0.153	0.1552	0.1567	0.1598	0.1681	0.1616	0.1627	0.1204	0.1234	0.0934	0.041	0.0127	0.0112	0.0022
	25	B. mirissimo	0.1854	0.1833	0.1854	0.1947	0.1645	0.1703	0.1634	0.1697	0.1656	0.1667	0.1711	0.1712	0.1732	0.1798	0.1732	0.1743	0.1151	0.1116	0.1166	0.0529	0.0636	0.0558	0.0558	0.0656
	26	B. albolineatus	0.1945	0.1902	0.1859	0.1949	0.1635	0.1668	0.1599	0.1657	0.1582	0.1614	0.1635	0.1622	0.166	0.1741	0.1677	0.1688	0.1192	0.1099	0.1088	0.0529	0.0654	0.0603	0.0558	0.0695	0.0065
	27	B. fuscolineatus	0.1731	0.1569	0.1567	0.1724	0.1465	0.1569	0.1471	0.1523	0.1499	0.151	0.1556	0.1556	0.1533	0.1602	0.1533	0.1545	0.098	0.0946	0.0901	0.0449	0.0539	0.0583	0.0538	0.0561	0.0045	0.0045
	28	B. boticario	0.1708	0.1523	0.1521	0.1678	0.1419	0.1523	0.1425	0.1473	0.1453	0.1465	0.151	0.151	0.1487	0.1556	0.1487	0.1499	0.0935	0.0901	0.0856	0.0404	0.0494	0.0538	0.0493	0.0516	0.0045	0.0045	0.0045
	29	B. actaeus	0.1989	0.1815	0.1883	0.195	0.1685	0.181	0.1708	0.1781	0.177	0.177	0.1813	0.1822	0.1796	0.1878	0.1813	0.1824	0.1322	0.1291	0.1046	0.0685	0.0743	0.0625	0.0625	0.0763	0.0468	0.0516	0.0426	0.0426
	30	B. quiririensis	0.1895	0.1682	0.1751	0.1909	0.1571	0.1743	0.1661	0.1732	0.1669	0.1669	0.1669	0.167	0.1693	0.1769	0.1702	0.1713	0.1131	0.113	0.0891	0.0702	0.0675	0.066	0.0615	0.0706	0.0486	0.0508	0.0448	0.0448	0.0255
	31	B. tabuleiro	0.1922	0.1722	0.181	0.1967	0.1651	0.1842	0.173	0.1806	0.1757	0.1745	0.1792	0.1786	0.1792	0.184	0.1769	0.1781	0.1086	0.1047	0.0886	0.0656	0.0656	0.0664	0.0569	0.0678	0.0487	0.0441	0.0429	0.0381	0.029	0.0199
	32	B. verrucosus	0.1753	0.1523	0.1617	0.1747	0.1499	0.1627	0.1529	0.1586	0.1556	0.1568	0.1613	0.1613	0.159	0.1659	0.159	0.1602	0.0905	0.0957	0.0777	0.0596	0.0528	0.0572	0.0527	0.0549	0.0348	0.0392	0.037	0.0348	0.0235	0.0123	0.0131
	33	B. mariaeterezae	0.1799	0.1569	0.1617	0.1747	0.1556	0.1684	0.1586	0.1648	0.1568	0.1579	0.1625	0.1625	0.1602	0.167	0.1602	0.1613	0.0984	0.0968	0.0743	0.0629	0.0562	0.0605	0.0561	0.0583	0.0426	0.0426	0.0426	0.0426	0.0179	0.0112	0.0095	0.0101
	34	B. olivaceus	0.185	0.1664	0.17	0.184	0.1606	0.176	0.1653	0.1725	0.1662	0.1662	0.1707	0.1704	0.1696	0.1764	0.1696	0.1707	0.1042	0.1013	0.0823	0.0658	0.0624	0.0617	0.0572	0.0645	0.0454	0.0454	0.0427	0.0427	0.0194	0.0123	0.0106	0.0101	0
	35	B. auroguttatus	0.1816	0.1623	0.1735	0.1871	0.1622	0.1767	0.1684	0.1751	0.1665	0.1676	0.172	0.1725	0.17	0.1775	0.1709	0.172	0.1057	0.1043	0.0899	0.0673	0.063	0.0615	0.057	0.0651	0.0452	0.0475	0.0426	0.0426	0.02	0.0131	0.0117	0.0101	0.0045	0.0056
	36	B. pombali	0.1835	0.1743	0.1875	0.1974	0.1667	0.1829	0.176	0.1831	0.1741	0.1752	0.1795	0.1803	0.1777	0.1859	0.1795	0.1806	0.1171	0.1142	0.0968	0.0695	0.0678	0.0647	0.0558	0.0698	0.0499	0.0503	0.0404	0.0404	0.0242	0.0173	0.0116	0.0123	0.0067	0.0088	0.0065
	37	B. ferruginus	0.1839	0.1794	0.184	0.194	0.1652	0.1869	0.1756	0.1839	0.177	0.176	0.1803	0.1804	0.1785	0.1867	0.1803	0.1813	0.1199	0.1142	0.0951	0.0663	0.0679	0.0647	0.0558	0.072	0.0523	0.0526	0.0404	0.0404	0.0221	0.0151	0.0139	0.0123	0.0067	0.0088	0.0107	0.0084
	38	B. coloratus	0.1737	0.1523	0.1643	0.1754	0.1557	0.1688	0.1588	0.1652	0.1568	0.158	0.1627	0.1627	0.1604	0.1651	0.158	0.1592	0.0916	0.0882	0.0696	0.0624	0.0579	0.067	0.0577	0.06	0.0485	0.0439	0.0439	0.0439	0.0231	0.0162	0.0095	0.015	0.0092	0.0092	0.0092	0.0023	0.0023
	39	B. pernix	0.1817	0.1769	0.1879	0.1957	0.167	0.1843	0.1763	0.1835	0.1745	0.1777	0.182	0.1836	0.1781	0.1863	0.1799	0.1809	0.1175	0.1121	0.0928	0.0706	0.072	0.067	0.058	0.074	0.0543	0.0546	0.0426	0.0426	0.0242	0.0184	0.0186	0.0146	0.009	0.0122	0.0118	0.0084	0.0084	0
