# Supplementary material for: Among the world’s smallest vertebrates: a new miniaturized flea-toad (Brachycephalidae) from the Atlantic rainforest
Source: PeerJ. 2024 Oct 25;12:e18265. doi: 10.7717/peerj.18265 (PMC11514764; doi:10.7717/peerj.18265)
Supplement: Supplemental Information 2 [file peerj-12-18265-s002.xlsx]

## Sheet: 3D scans
Species	catalog #	voxel size (micron)	Snout-Urostyle Length (mm)	Link	MS link (scan)	MS link (mesh)	notes
Brachycephalus dacnis	ZUEC-AMP-24979	5.06	7.4	https://sketchfab.com/3d-models/brachycephalus-dacnis-zeuc-amp-24979-688c060bd92c4dfb80b11943914defb7	https://www.morphosource.org/concern/media/000604328?locale=en	https://www.morphosource.org/concern/media/000604367?locale=en
Brachycephalus dacnis	ZUEC-AMP-24978	7.01	7.27	https://sketchfab.com/3d-models/brachycephalus-dacnis-zuec-amp-24978-b7a2eb7d938b40ac812fb81dbf632b0b	https://www.morphosource.org/concern/media/000604333?locale=en	https://www.morphosource.org/concern/media/000604370?locale=en
Brachycephalus hermogenesi	ZUEC-amp-24980	6.5	8.31	https://sketchfab.com/3d-models/b-hermogenesi-zuec-amp-24980-b466ab98d89a4e23a5959950fd02cb9d	https://www.morphosource.org/concern/media/000604339?locale=en	https://www.morphosource.org/concern/media/000604372?locale=en
Brachycephalus nanicus	ZUEC-AMP-25610	6.29	6.8	https://sketchfab.com/3d-models/b-nanicus-zeuc-amp-25610-ed65ad9c6afc4e02a3239f568b7c2c3e	https://www.morphosource.org/concern/media/000604344?locale=en	https://www.morphosource.org/concern/media/000604377?locale=en
Brachycephalus nanicus	ZUEC AMP 25580	5.64	5.46	https://sketchfab.com/3d-models/b-nanicus-zuec-amp-25580-4b720a8aca904e669e8d6b763c21b8e4	https://www.morphosource.org/concern/media/000604349?locale=en	https://www.morphosource.org/concern/media/000604379?locale=en
Brachycephalus pernix	MHNCI9809	11.55	12.91	https://sketchfab.com/3d-models/b-pernix-mhnc-19809-015475f0b7424dcea9977e22734f348f	https://www.morphosource.org/concern/media/000604354?locale=en	https://www.morphosource.org/concern/media/000604382?locale=en
Brachycephalus sulfuratus	UFPR-DZUP151	11.55	8.33	https://sketchfab.com/3d-models/b-sulfuratus-dzup-151-f84f9978d97649b584380d851baab14d	https://www.morphosource.org/concern/media/000604359?locale=en	https://www.morphosource.org/concern/media/000604385?locale=en
Brachycephalus sulfuratus	UFPR-DZUP152	11.55	7.99	https://sketchfab.com/3d-models/b-sulfuratus-dzup-152-3d300968962641b680e4efb2a96ed416	https://www.morphosource.org/concern/media/000604364?locale=en
Psyllophryne didactyla	MCZA109799	9.44	8.55	https://sketchfab.com/3d-models/p-didactyla-mcza-109799-1d06f2d4de2c45ba9b382847bfd68f62	https://www.morphosource.org/concern/media/000050083?locale=en	https://www.morphosource.org/concern/media/000582351?locale=en
Brachycephalus pitanga	mnrj:60793	8.26732	13.14	https://sketchfab.com/3d-models/b-pitanga-mnrj-60793-c1f4ce4024b64585867d06883da4ccc2	https://www.morphosource.org/concern/media/000359846?locale=en	https://www.morphosource.org/concern/media/000582270?locale=en
Brachycephalus toby	mnrj:76383	9.70458	13.76	https://sketchfab.com/3d-models/b-toby-mnrj-76383-399018c253804e9787989ca54169bb2d	https://www.morphosource.org/concern/media/000359804?locale=en	https://www.morphosource.org/concern/media/000582256?locale=en
Brachycephalus vertebralis	mnrj:89201	8.62621	14.64	https://sketchfab.com/3d-models/b-vertebralis-mnrj-89201-61c2504026a944cdbe0401975c87cdfe	https://www.morphosource.org/concern/media/000359852?locale=en	https://www.morphosource.org/concern/media/000582250?locale=en
Brachycephalus clarrisae	mnrj:89562	7.90672	9.83	https://sketchfab.com/3d-models/b-clarrissae-mnrj-89562-25741aff5eb4463dbb19b2244043935b	https://www.morphosource.org/concern/parent/000357037/media/000357040	https://www.morphosource.org/concern/media/000582244?locale=en	some of the images were unreadable in VGStudio. Used Fiji to convert the file format
Brachycephalus margaritatus	mnrj:80998	17.6103	16.18	https://sketchfab.com/3d-models/b-margaritas-mnrj-80998-8faf26568e7a46eeab7a7a2c6dea12d0	https://www.morphosource.org/concern/media/000359689?locale=en	https://www.morphosource.org/concern/media/000582253?locale=en	some of the images were unreadable in VGStudio. Used Fiji to convert the file format
Brachycephalus garbeanus	mnrj:25398	9.99906	14.84	https://sketchfab.com/3d-models/b-garbeanus-mnrj-25398-c5def90baed546db98695c58b4429f62	https://www.morphosource.org/concern/parent/000359854/media/000359857	https://www.morphosource.org/concern/media/000582247?locale=en

## Sheet: Scan parameters
Catalog number	voxel size	Voltage (kV)	Current (mA)	Exposure timing	Frame averaging	Filter
24978	5.06	60	110	333	3 (skip 1)	none
24979	7.01	60	250	500	3 (skip 1)	none
24980	6.5	60	110	333	3 (skip 1)	none
