# Supplementary material for: Among the world’s smallest vertebrates: a new miniaturized flea-toad (Brachycephalidae) from the Atlantic rainforest
Source: PeerJ. 2024 Oct 25;12:e18265. doi: 10.7717/peerj.18265 (PMC11514764; doi:10.7717/peerj.18265)
Supplement: Supplemental Information 3 [file peerj-12-18265-s003.xlsx]

## Sheet: Table S4
Specie	Specimen-Voucher	Local	Species group	Body plan	GenBank Acc. number	Palumbi fragment
Brachycephalus dacnis	ZUEC-AMP 24984	Reserva Dacnis, Ubatuba, SP	B. didactylus	leptodactyliform	OR250411	ok
Brachycephalus dacnis	ZUEC-AMP 24978	Reserva Dacnis, Ubatuba, SP	B. didactylus	leptodactyliform	OR250412	ok
Brachycephalus dacnis	ZUEC-AMP 24981	Reserva Dacnis, Ubatuba, SP	B. didactylus	leptodactyliform	OR250413	ok
Brachycephalus dacnis	ZUEC-AMP 24982-Holotype	Reserva Dacnis, Ubatuba, SP	B. didactylus	leptodactyliform	OR250414	ok
Brachycephalus dacnis	ZUEC-AMP 25270	Reserva Dacnis, Ubatuba, SP	B. didactylus	leptodactyliform	OR250415	ok
Brachycephalus dacnis	ZUEC-AMP 25272	Reserva Dacnis, Ubatuba, SP	B. didactylus	leptodactyliform	OR250416	ok
Brachycephalus dacnis	ZUEC-AMP 25274	Reserva Dacnis, Ubatuba, SP	B. didactylus	leptodactyliform	OR250417	ok
Brachycephalus dacnis	ZUEC-AMP 25275	Reserva Dacnis, Ubatuba, SP	B. didactylus	leptodactyliform	OR250418	ok
Brachycephalus hermogenesi	TC129	Salesópolis, SP	B. didactylus	leptodactyliform	MT929506	ok
Brachycephalus hermogenesi	TC133	Salesópolis, SP	B. didactylus	leptodactyliform	MT929507	ok
Brachycephalus hermogenesi	MVTIS 3210	PESM Nucleo Santa Virginia, São Luiz do Paraitinga, SP	B. didactylus	leptodactyliform	MZ770740	ok
Brachycephalus hermogenesi	ZUEC-AMP 24983	Reserva Dacnis, Ubatuba, SP	B. didactylus	leptodactyliform	OR250409	ok
Brachycephalus hermogenesi	ZUEC-AMP 24980	Reserva Dacnis, Ubatuba, SP	B. didactylus	leptodactyliform	OR250410	ok
Brachycephalus pulex	PU65	Camacan, BA	B. didactylus	leptodactyliform	MT929509	ok
Brachycephalus pulex		Arataca, BA	B. didactylus	leptodactyliform	MZ770742	ok
Brachycephalus puri	MZUSP139152	Ibitirama, ES	B. didactylus	leptodactyliform	OK298954	ok
Brachycephalus puri	MZUSP139154	Ibitirama, ES	B. didactylus	leptodactyliform	OK298955	ok
Brachycephalus sp. FT	ZUEC-AMP25581	Bananal, SP	B. didactylus	leptodactyliform	OR250404	ok
Brachycephalus sp. FT	ZUEC-AMP25578	Bananal, SP	B. didactylus	leptodactyliform	OR250405	ok
Brachycephalus sp8	CTMZ 01522/ MZUSP133731	Bananal, SP	B. didactylus	leptodactyliform	MK697410
Brachycephalus sp8		Ilha Grande, Angra dos Reis, RJ	B. didactylus	leptodactyliform	HQ435692	ok
Brachycephalus clarissae	MNRJ 56504	Nova Friburgo, RJ	B. didactylus	intermediate	MK697394
Brachycephalus clarissae	MNRJ 56516	Nova Friburgo, RJ	B. didactylus	intermediate	MK697395
Brachycephalus didactylus	CFBH11506	Terespolis, RJ	B. didactylus	leptodactyliform	MK697365/ JX267467	ok
Brachycephalus didactylus	MNRJ37327	Terespolis, RJ	B. didactylus	leptodactyliform	MT929504	ok
Brachycephalus darkside	PPGT600	Ervalia, MG	B. ephippium	bufoniform	MT734440
Brachycephalus ephippium	MNRJ 56517	Cachoeiras de Macacu, RJ	B. ephippium	bufoniform	MK697366
Brachycephalus ephippium	CFBH 12355	Terespolis, RJ	B. ephippium	bufoniform	MK697367
Brachycephalus garbeanus	MNRJ51472	Macaé de Cima, RJ	B. ephippium	bufoniform	MT929466	ok
Brachycephalus garbeanus	CFBH16800	Macaé de Cima, RJ	B. ephippium	bufoniform	MT929467	ok
Brachycephalus ibitinga	CFBH 19348	Itanhaem, SP	B. ephippium	bufoniform	MK697399
Brachycephalus ibitinga	CFBH 2978	São Paulo, SP	B. ephippium	bufoniform	MK697401
Brachycephalus margaritatus	MNRJ73702	Engenheiro Paulo de Frontin, RJ	B. ephippium	bufoniform	MT929478	ok
Brachycephalus margaritatus	MNRJ76100	Engenheiro Paulo de Frontin, RJ	B. ephippium	bufoniform	MT929479	ok
Brachycephalus rotenbergae	CFBH16828	São José dos Campos, SP	B. ephippium	bufoniform	MT929457	ok
Brachycephalus rotenbergae	MVTIS 3213	Mogi das Cruzes, SP	B. ephippium	bufoniform	MZ770745	ok
Brachycephalus sp6	CFBH 44422	Bananal, SP	B. ephippium	bufoniform	MK697406
Brachycephalus sp6	CFBH 44424	Cunha, SP	B. ephippium	bufoniform	MK697407
Brachycephalus alipioi		Vargem Alta, ES	B. vertebralis	bufoniform	HQ435690	ok
Brachycephalus alipioi	AL1	Vargem Alta, ES	B. vertebralis	bufoniform	MT929481	ok
Brachycephalus bufunoides	ZUFRJ 15428	Nova Friburgo, RJ	B. vertebralis	bufoniform	MH259788	ok
Brachycephalus bufunoides	ZUFRJ 15426	Nova Friburgo, RJ	B. vertebralis	bufoniform	MH259791	ok
Brachycephalus crispus	TC34	Cunha, SP	B. vertebralis	bufoniform	MT929483	ok
Brachycephalus crispus	TC36	Cunha, SP	B. vertebralis	bufoniform	MT929484	ok
Brachycephalus guarani	PRU1	Ubatuba, SP	B. vertebralis	bufoniform	MT929485	ok
Brachycephalus guarani	PRU3	Ubatuba, SP	B. vertebralis	bufoniform	MT929487	ok
Brachycephalus herculeus	CFBH 13724	Santa Maria Madalena, RJ	B. vertebralis	bufoniform	MK697396
Brachycephalus nodoterga	BO130	Salespolis, SP	B. vertebralis	bufoniform	KJ649772	ok
Brachycephalus nodoterga	CA2226	Serra Cantareira, São Paulo, SP	B. vertebralis	bufoniform	KJ649779	ok
Brachycephalus nodoterga	IB634	São Sebastiao, SP	B. vertebralis	bufoniform	KJ649781	ok
Brachycephalus pitanga		São Luiz do Paraitinga, SP	B. vertebralis	bufoniform	HQ435699	ok
Brachycephalus pitanga	MVTIS 3205	São Luiz do Paraitinga, SP	B. vertebralis	bufoniform	MZ770741	ok
Brachycephalus sp3	CFBH 44409	Ubatuba, SP	B. vertebralis	bufoniform	MK697397
Brachycephalus toby		Ubatuba, SP	B. vertebralis	bufoniform	HQ435701	ok
Brachycephalus toby	TO1	Ubatuba, SP	B. vertebralis	bufoniform	MT929499	ok
Brachycephalus vertebralis		Ubatuba, SP	B. vertebralis	bufoniform	HQ435702	ok
Brachycephalus vertebralis	CFBH1388	Ubatuba, SP	B. vertebralis	bufoniform	MT929502	ok
Brachycephalus sulfuratus	CFBH39141	São Francisco do Sul, SC		leptodactyliform	MK697392	ok
Brachycephalus sulfuratus		São Francisco do Sul, SC		leptodactyliform	MZ770751
Brachycephalus actaeus		São Francisco do Sul, SC	B. pernix	bufoniform	MZ770736	ok
Brachycephalus actaeus		São Francisco do Sul, SC	B. pernix	bufoniform	MZ770737	ok
Brachycephalus albolineatus		Jaraguá do Sul, SC	B. pernix	bufoniform	MZ770738	ok
Brachycephalus auroguttatus	Bauroguttatus2	Garuva, SC	B. pernix	bufoniform	KX025355	ok
Brachycephalus auroguttatus		Garuva, SC	B. pernix	bufoniform	MZ770739	ok
Brachycephalus boticario	Bboticario1	Blumenau, SC	B. pernix	bufoniform	KX025370	ok
Brachycephalus boticario	Bboticario2	Blumenau, SC	B. pernix	bufoniform	KX025371	ok
Brachycephalus brunneus		Campina Grande do Sul PR	B. pernix	bufoniform	HQ435691	ok
Brachycephalus brunneus	CAPR1	Campina Grande do Sul PR	B. pernix	bufoniform	MT929511	ok
Brachycephalus coloratus	Ind1	Piraquara, PR	B. pernix	bufoniform	MT928335	ok
Brachycephalus coloratus	Ind3	Piraquara, PR	B. pernix	bufoniform	MT928336	ok
Brachycephalus curupira	BSalto4	Serra do Salto, São José dos Pinhais, PR	B. pernix	bufoniform	KX025381	ok
Brachycephalus curupira	BSalto5	Serra do Salto, São José dos Pinhais, PR	B. pernix	bufoniform	KX025382	ok
Brachycephalus ferruginus		Morretes, PR	B. pernix	bufoniform	HQ435695	ok
Brachycephalus ferruginus		Morretes, PR	B. pernix	bufoniform	MT929515	ok
Brachycephalus fuscolineatus	Bfuscolineatus1	Ilhota, SC	B. pernix	bufoniform	KX025296	ok
Brachycephalus fuscolineatus	Bfuscolineatus2	Ilhota, SC	B. pernix	bufoniform	KX025297	ok
Brachycephalus izecksohni		Morretes, PR	B. pernix	bufoniform	HQ435696	ok
Brachycephalus izecksohni	TPPR1	Morretes, PR	B. pernix	bufoniform	MT929518	ok
Brachycephalus leopardus	Bleopardus2	Tijucas do Sul, PR	B. pernix	bufoniform	KX025240	ok
Brachycephalus leopardus	Bleopardus3	Tijucas do Sul, PR	B. pernix	bufoniform	KX025241	ok
Brachycephalus mariaeterezae	Bmariaterezae2	Joinville, SC	B. pernix	bufoniform	KX025344	ok
Brachycephalus mariaeterezae	Bmariaterezae3	Joinville, SC	B. pernix	bufoniform	KX025345	ok
Brachycephalus mirissimus		Massaranduba, SC	B. pernix	bufoniform	MH136570	ok
Brachycephalus olivaceus	Bolivaceus1	Joinville, SC	B. pernix	bufoniform	KX025300	ok
Brachycephalus olivaceus	TC236	Joinville, SC	B. pernix	bufoniform	MG889435	ok
Brachycephalus pernix		Quatro Barras, PR	B. pernix	bufoniform	HQ435698	ok
Brachycephalus pernix	AGPR2	Quatro Barras, PR	B. pernix	bufoniform	MT929522	ok
Brachycephalus pombali		Guaratuba, PR	B. pernix	bufoniform	HQ435700	ok
Brachycephalus pombali	SIPR1	Guaratuba, PR	B. pernix	bufoniform	MT929525	ok
Brachycephalus quiririensis	Bquiririensis2	Campo Alegre, SC	B. pernix	bufoniform	KX025318	ok
Brachycephalus quiririensis		CampoAlegre SC	B. pernix	bufoniform	MZ770743	ok
Brachycephalus sp9	CFBH 42815	Corupá, SC	B. pernix	bufoniform	MK697411
Brachycephalus tabuleiro	MNRJ93858	São Bonifácio, SC	B. pernix	bufoniform	OR116969	ok
Brachycephalus tabuleiro	UNIFESSPA112	São Bonifácio, SC	B. pernix	bufoniform	OR116970	ok
Brachycephalus tridactylus	Btridactylus2	Guaraqueçaba, PR	B. pernix	bufoniform	KX025388	ok
Brachycephalus tridactylus	TRID-5	Guaraqueçaba, PR	B. pernix	bufoniform	MG889432	ok
Brachycephalus verrucosus	Bverrucosus9	Joinville, SC	B. pernix	bufoniform	KX025234	ok
Brachycephalus verrucosus	Bverrucosus10	Joinville, SC	B. pernix	bufoniform	KX025235	ok
Ischnocnema henseli		Jaraguá do Sul, SC	out-group		MZ770752	not included
